# Supplementary material for: SEPT12-Microtubule Complexes Are Required for Sperm Head and Tail Formation
Source: Int J Mol Sci. 2013 Nov 7;14(11):22102–16. doi: 10.3390/ijms141122102 (PMC3856054; doi:10.3390/ijms141122102)

# Supplementary Information

**Figure S1.** SEPT12-GFP interacts with  $\alpha$ -tubulin and  $\beta$ -tubulin in 293T cell line. Co-IP of  $\alpha$ -tubulin (A) and  $\beta$ -tubulin (B) with SEPT12-GFP with. Lysates from transfected 293T cells were immunoprecipitated (IP) with anti- $\alpha$ -tubulin antibody (A. left panel, lane3), anti- $\beta$ -tubulin (B. right panel, lane 3), or a nonspecific control IgG (left and right panel, lane 2), followed by immuno-blotting (IB) with anti-GFP antibody. Input protein (5%) was used as control of immuno-blotting (IB) in the transfected cell lysates.

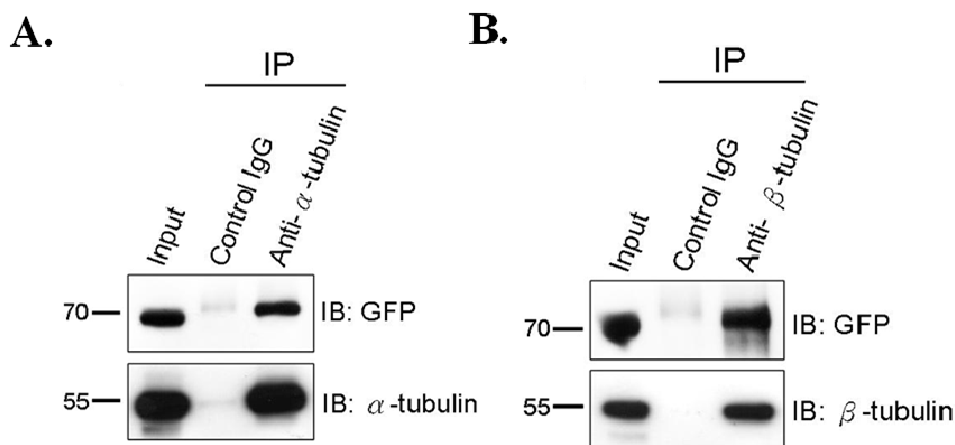

**Figure S2.** The SEPTIN12-EGFP copy number in the transgenic mice. (A) Real-time PCR was used to determine the SEPTIN12-EGFP copy number in the transgenic mice; (B) Standard curves of ectopic SEPTIN12-EGFP and endogenous Septin12; (C) Calculation formula of SEPTIN12-EGFP copy number.

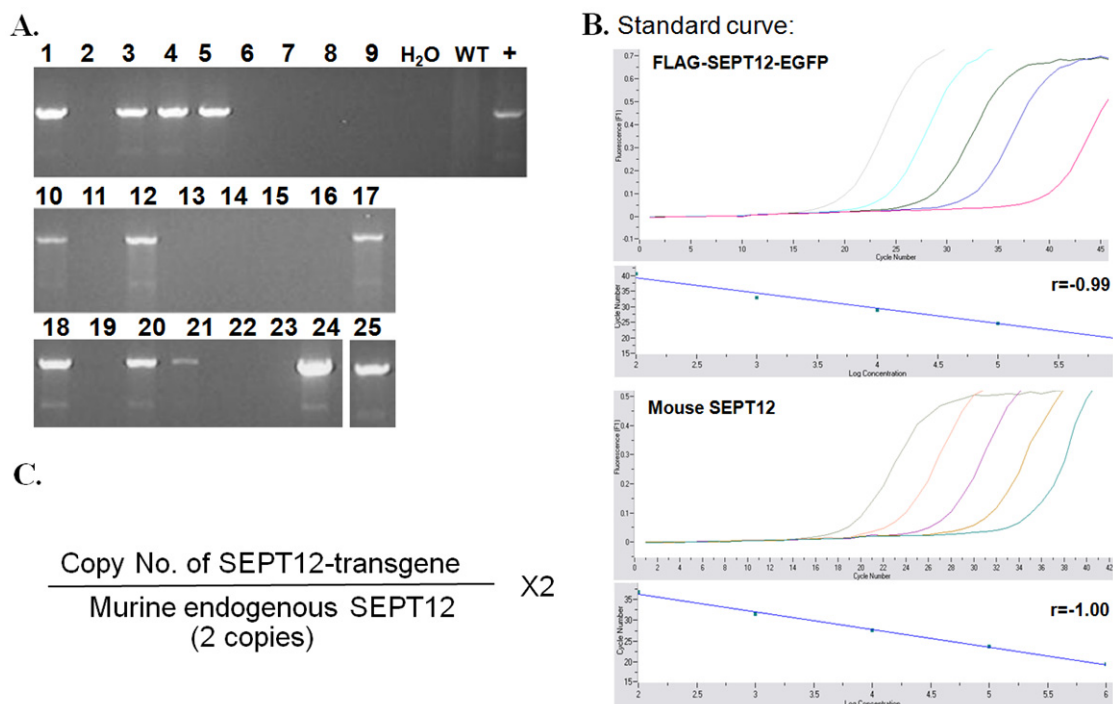

**Figure S3.** SEPT12 is co-localized with  $\alpha$ -tubulin and  $\beta$ -tubulin at elongation stage of spermatids in the wild-type mice. (A and B) Immuno-fluorescence detection of SEPT12 and  $\alpha$ -tubulin (A) or  $\beta$ -tubulin (B). (a.) early elongation stage and (b.) elongation stage. From left to right: DAPI (Blue), tubulin (Red), SEPT12 (green) and merged pictures for DAPI, tubulin and SEPT12.

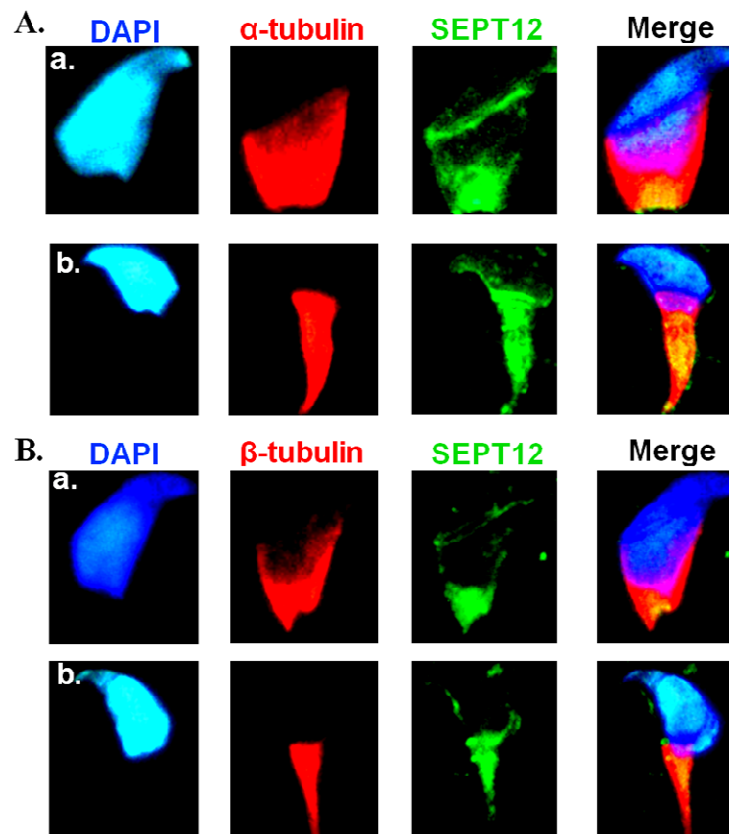

Supplement: Supplementary file 1 [file ijms-14-22102-s001.pdf]
